# Supplementary material for: Oxygen level is a critical regulator of human B cell differentiation and IgG class switch recombination
Source: PubMed Central journal article supplement (PMC9795029; doi:10.3389/fimmu.2022.1082154), 2022-12-14
Supplement: DataSheet_1.pdf [file DataSheet_1.pdf]

# Supplementary Figures

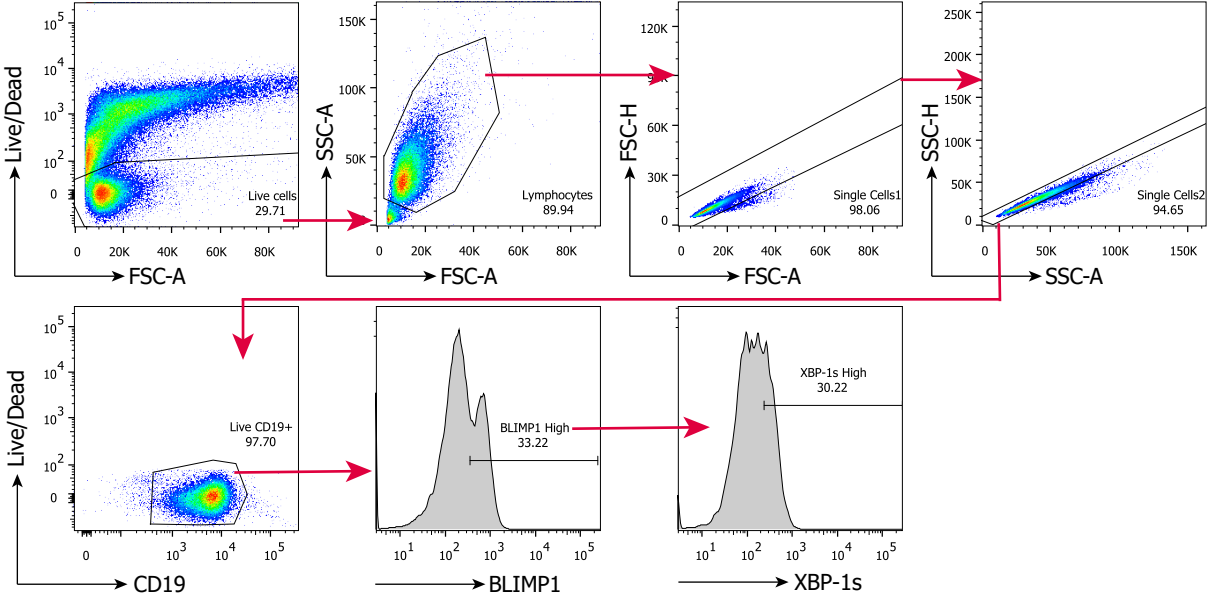

**Figure S1.** Representative gating strategy of B cells after culture. First live cells are gated based on viability dye and FSC-A, subsequently lymphocytes are gated using FSC-A and SSC-A, two gates to select singles, based on FSC and SSC A and H parameters. Finally cells were gated as live, CD19+ whereupon specific phenotyping and transcription factor markers were gated. Example gating strategy for BLIMP1 and XBP-1s gates.

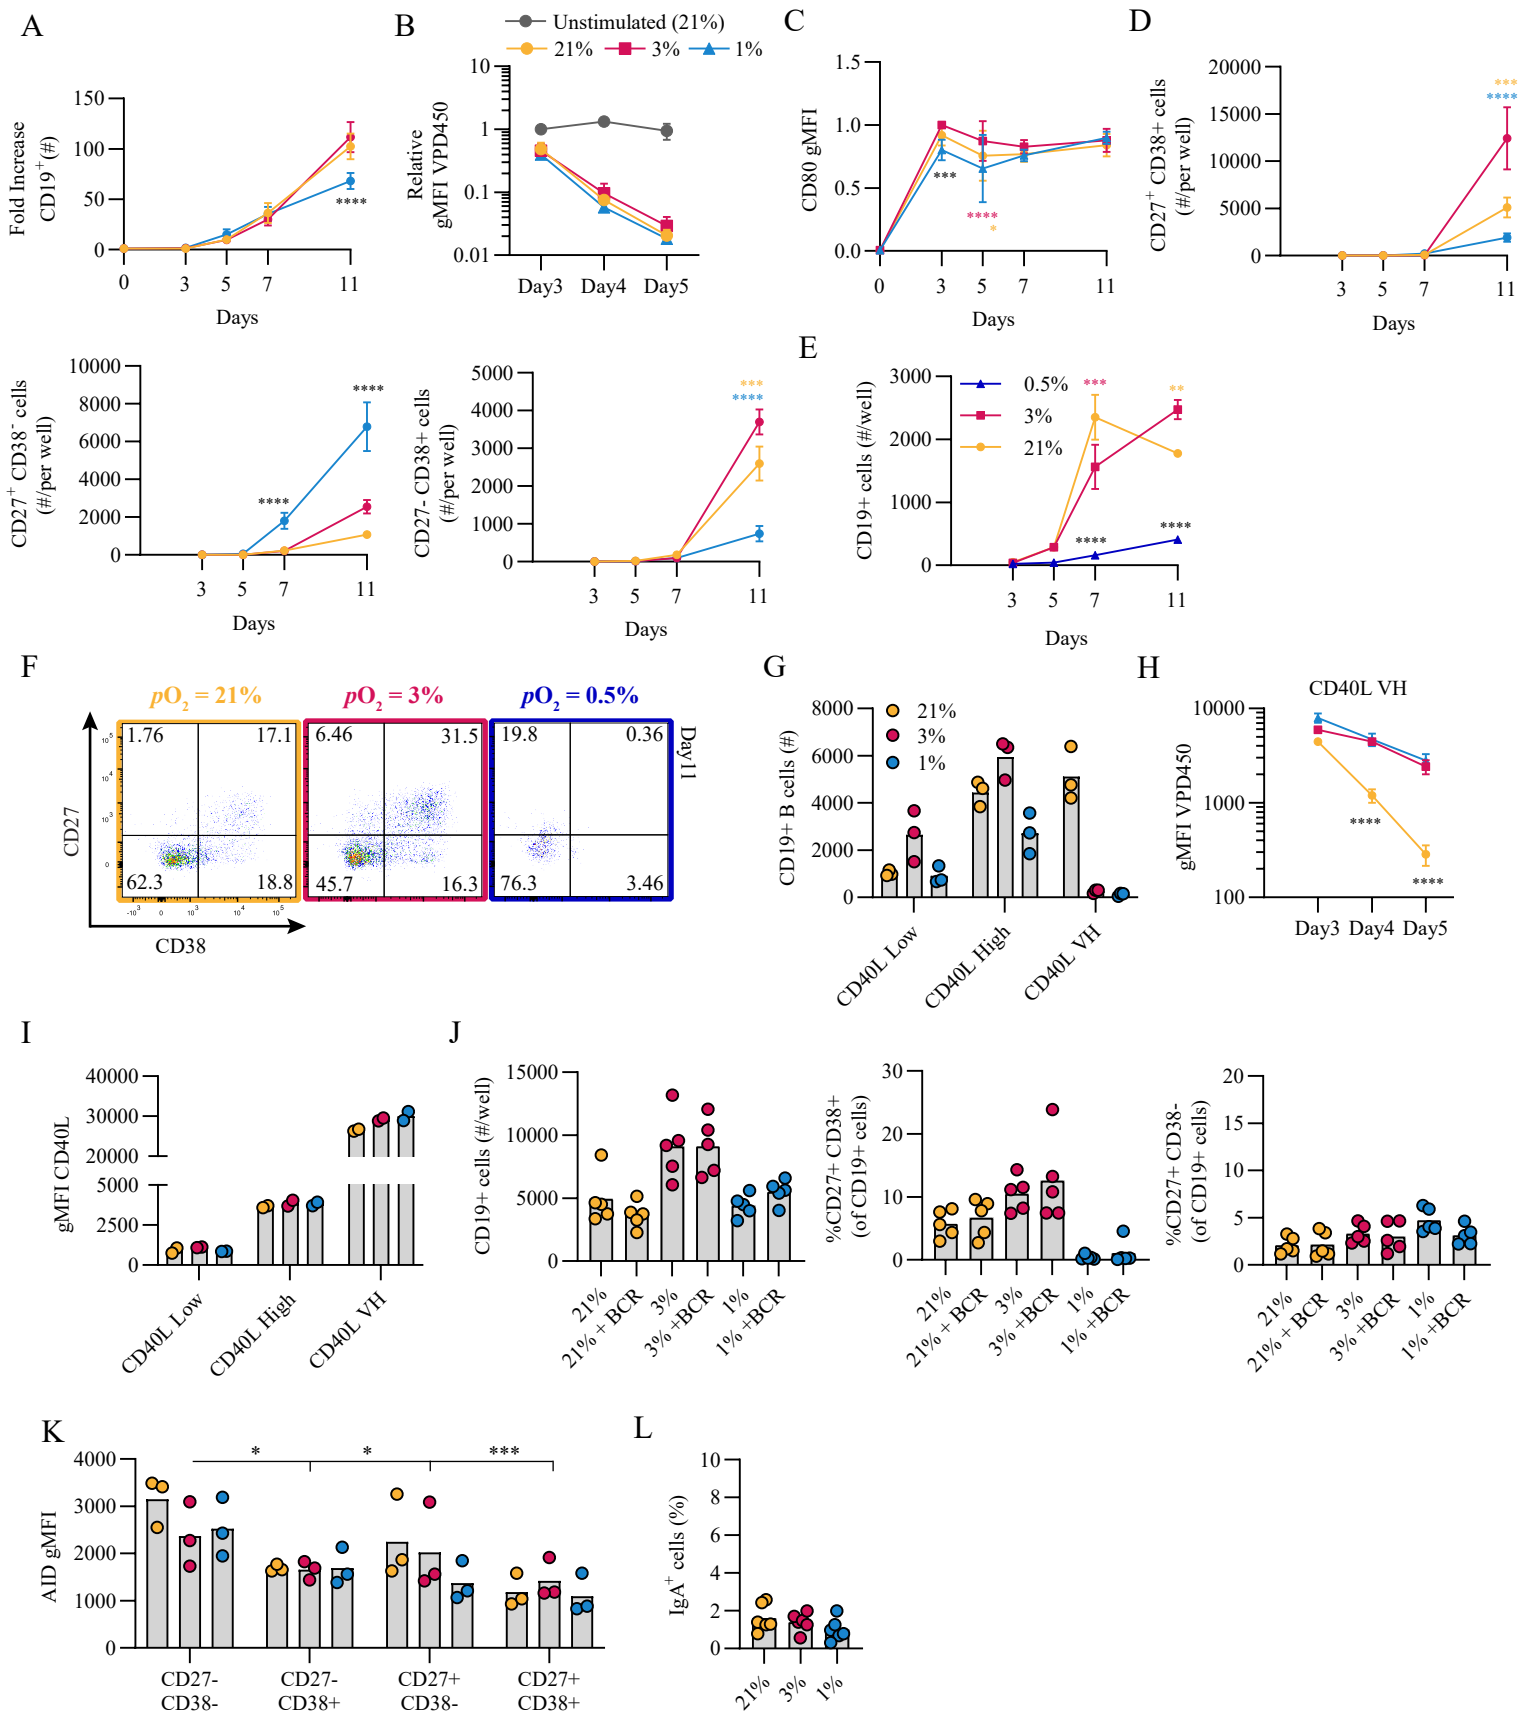

**Figure S2.** Hypoxia promotes human B cell differentiation *in vitro*. (A) Fold increase in number of CD19<sup>+</sup> cells over the course of the culture compared to day 0 (250 cells/well,  $n = 9$ ). (B) Proliferation ( $n = 3$ ). (C) gMFI CD80 ( $n = 6$ ). (D) The number of CD19<sup>+</sup> cells retrieved per well within the CD27/CD38 quadrants ( $n = 9$ ). (E) Number of live CD19<sup>+</sup> cells present in cultures using 0.5, 3 and 21% pO<sub>2</sub> at day 11 of culture. (F) Representative CD27/CD38 biaxial plot showing the differentiation of naive B cells at 0.5, 3 and 21% pO<sub>2</sub> at day 11 of culture. (G) Number of live CD19<sup>+</sup> cells in cultures stimulated with IL-4 + IL-21 and human CD40L low, high or very high (VH) co-stimulation cultured at 21, 3 and 1% pO<sub>2</sub> for 11 days ( $n = 3$ ). (H) As in (G) for proliferation at day 3, 4 and 5 ( $n = 3$ ). (I) Expression levels of human CD40L low, high and very high (VH) expressed on mice 3T3 fibroblast cells cultured at 21, 3 and 1% pO<sub>2</sub> for 5 days ( $n = 2$ ). (J) Number of live CD19<sup>+</sup> cells, percentage of CD27<sup>+</sup>CD38<sup>+</sup> and CD27<sup>+</sup>CD38<sup>-</sup> cells in cultures with and without 1 μg/ml anti-IgM F(ab')<sub>2</sub> cultured for 11 days. ( $n = 5$ ) (K) AID expression within the different CD27/CD38 quadrants ( $n = 3$ ). (L) IgA<sup>+</sup> B cells after 11 days of culture ( $n = 6$ ). Bars represent means of biological replicates each composed of two technical replicates of (F-I, K) 1, (A, B, J, L) 2 or (C-E) 3 independent experiments. Statistical differences were determined using (B-F) mixed effects model using Tukey's test for multiple comparisons. (H-J) repeated measures one-way

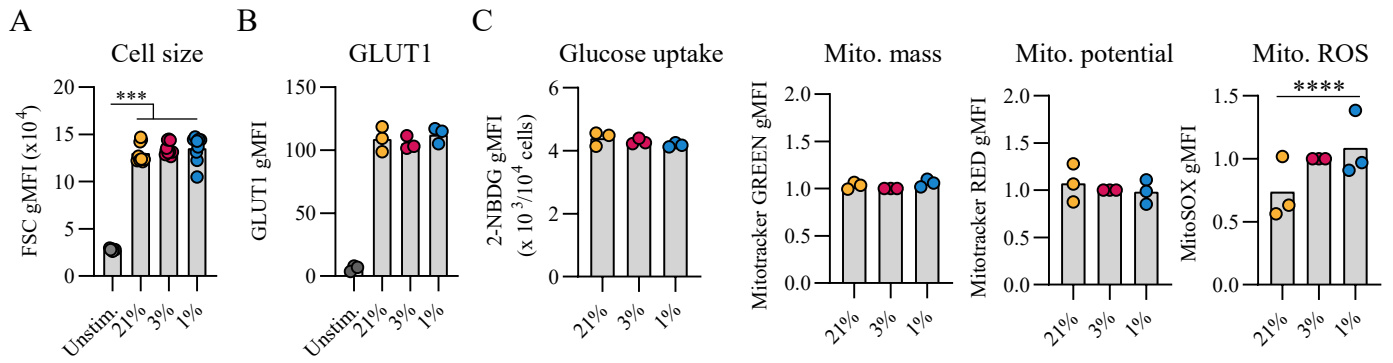

**Figure S3.** B cell cultured at hypoxic  $pO_2$  alter their metabolic program. At day 7 of culture (A) Cell size determined as gMFI of the forward scatter (FSC,  $n=14$ ), (B) gMFI of GLUT1 expression, and (C) gMFI of 2-NBDG, MitoTracker GREEN, MitoTracker RED, and MitoSOX in cells cultured at differential  $pO_2$  for 11 days ( $n=3$ ). Bars represent means of biological replicates each composed of two technical replicates of (A) 2 (B-C) or 1 independent experiments. Statistical differences were determined using repeated measures one-way ANOVA using Tukey's test for multiple comparisons. \*\*\*  $p < 0.001$ , \*\*\*\*  $p < 0.0001$ .

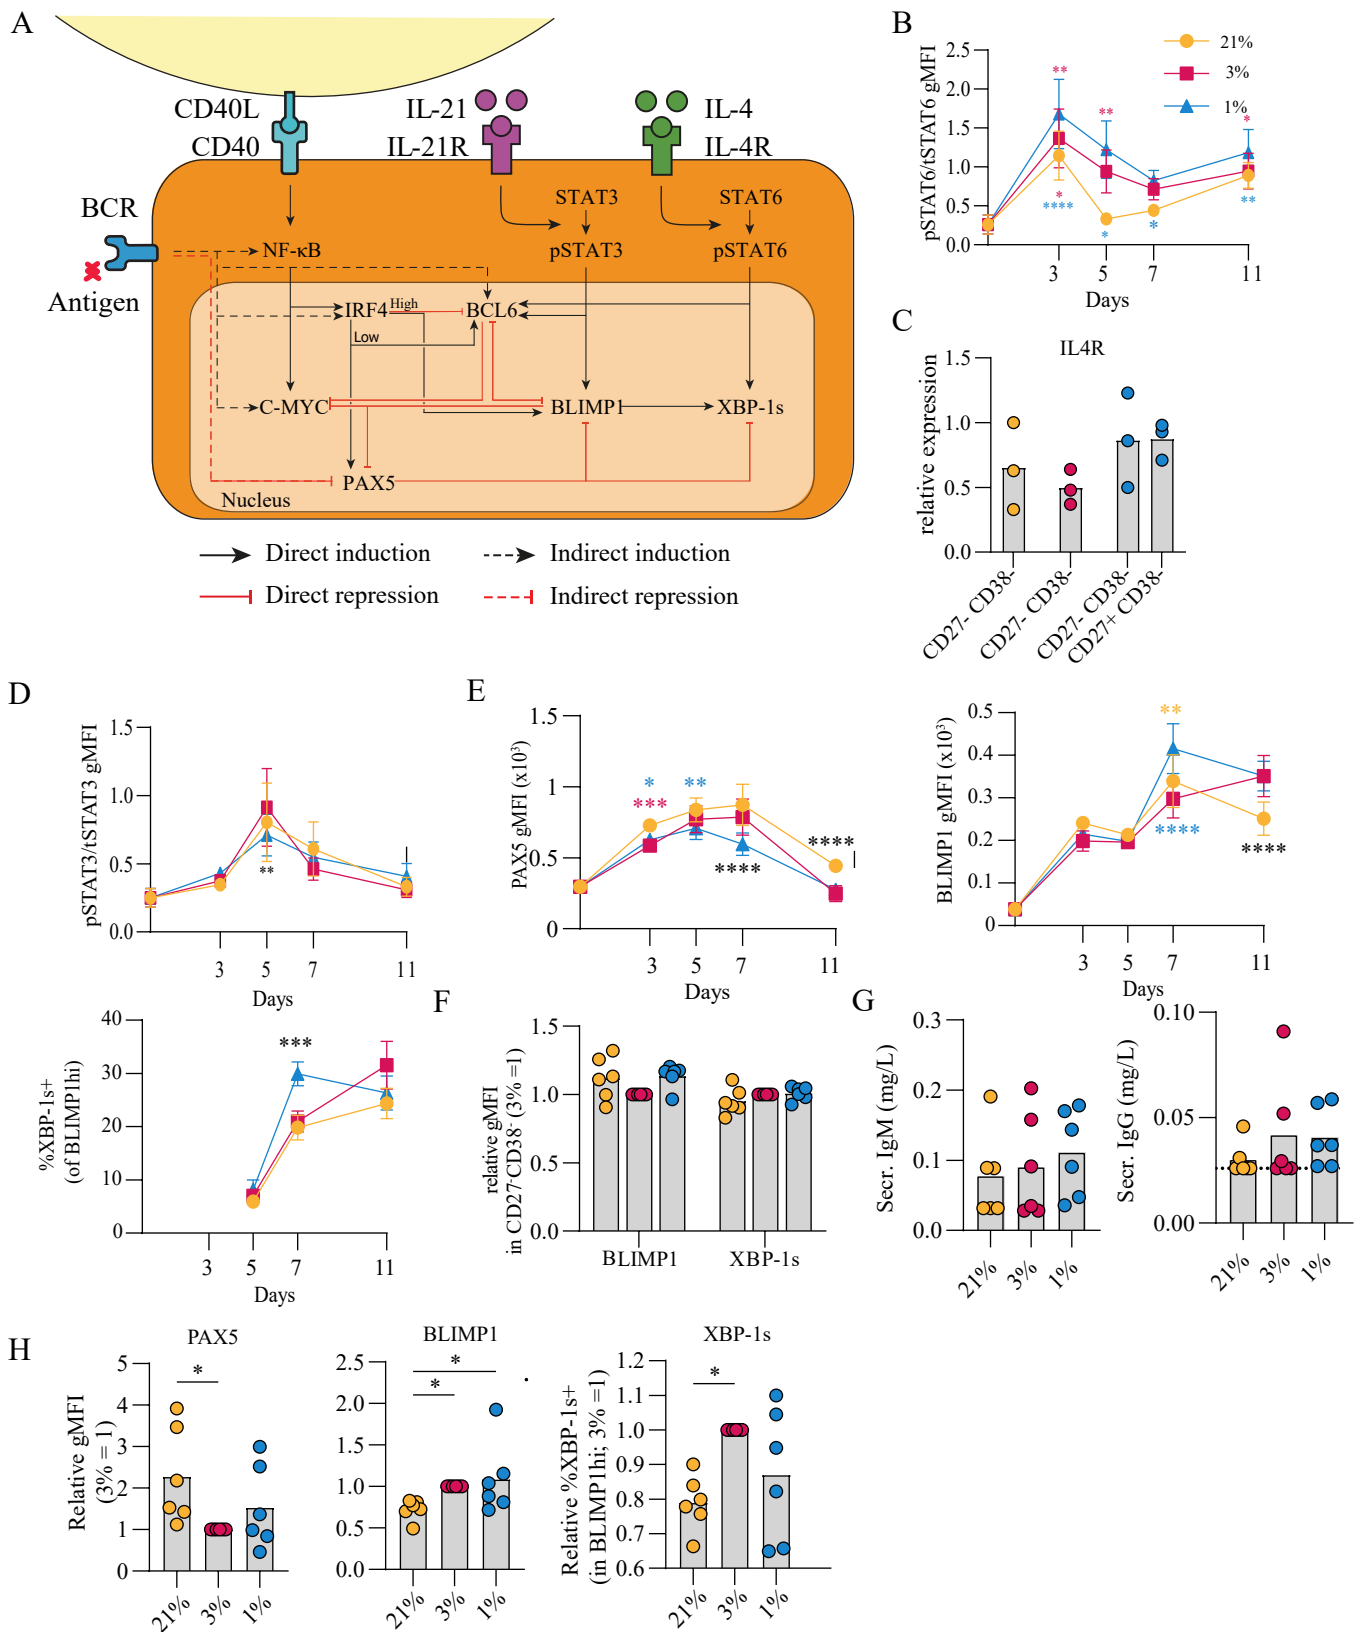

**Figure S4**  $pO_2$  steers molecular signaling underlying B cell differentiation (A) Schematic representation of intracellular signaling events leading to TF expression regulation upon B cell stimulation with typical T<sub>fh</sub> signals including CD40L, IL-21 and IL-4. (B) ratio of pSTAT6/tSTAT6 gMFI ( $n = 6$ ). (C) Relative expression of IL-4R mRNA as determined by RT-qPCR ( $n = 3$ ). (D) ratio of pSTAT3/tSTAT3 gMFI ( $n = 6$ ) (E) gMFI of PAX5, BLIMP1 and %XBP-1s over time ( $n = 6$ ) (F) gMFI of BLIMP1 and XBP-1s within CD27<sup>-</sup> CD38<sup>-</sup> population. ( $n = 6$ ) (G) secreted IgM and IgG as measured by ELISA on day 7 of culture ( $n = 6$ ) (H) gMFI of PAX5, BLIMP1 and %XBP-1s at day 11 ( $n = 6$ ). Bars represent means of biological replicates each composed of two technical replicates of (B, D-H) 2 or (C) 1 independent experiments. Statistical differences were determined using (B, D-E) mixed-effects analysis using Tukey's test for multiple comparisons or (C, F-H) using repeated measures one-way ANOVA using Tukey's test for multiple comparisons. \*  $p < 0.05$ , \*\*  $p < 0.01$ , \*\*\*  $p < 0.001$ , \*\*\*\*  $p < 0.0001$ .

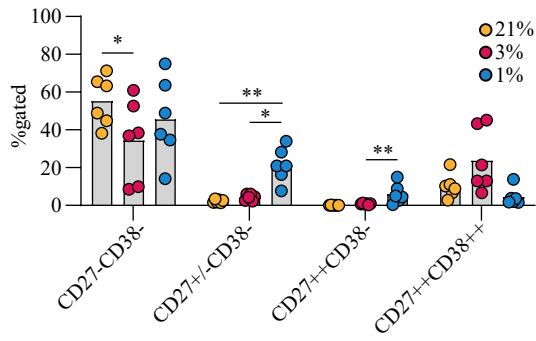

**Figure S5** hypoxic  $pO_2$  leads to generation of pre-ASC CD27<sup>+</sup> B cell subset. (A) Quantification of cells in CD27<sup>-</sup>CD38<sup>-</sup>, CD27<sup>+/+</sup>CD38<sup>-</sup>, CD27<sup>-</sup>CD38<sup>+</sup>, CD27<sup>+/+</sup>CD38<sup>+</sup> gates on day 11 of culture ( $n = 6$ ) ( $n = 5$ ) Bars represent means of biological replicates each composed of two technical replicates of 1 independent experiment. Statistical differences were determined using mixed effects analysis using Tukey's test for multiple comparisons \*  $p < 0.05$ , \*\*  $p < 0.01$ , \*\*\*  $p < 0.001$ , \*\*\*\*  $p < 0.0001$

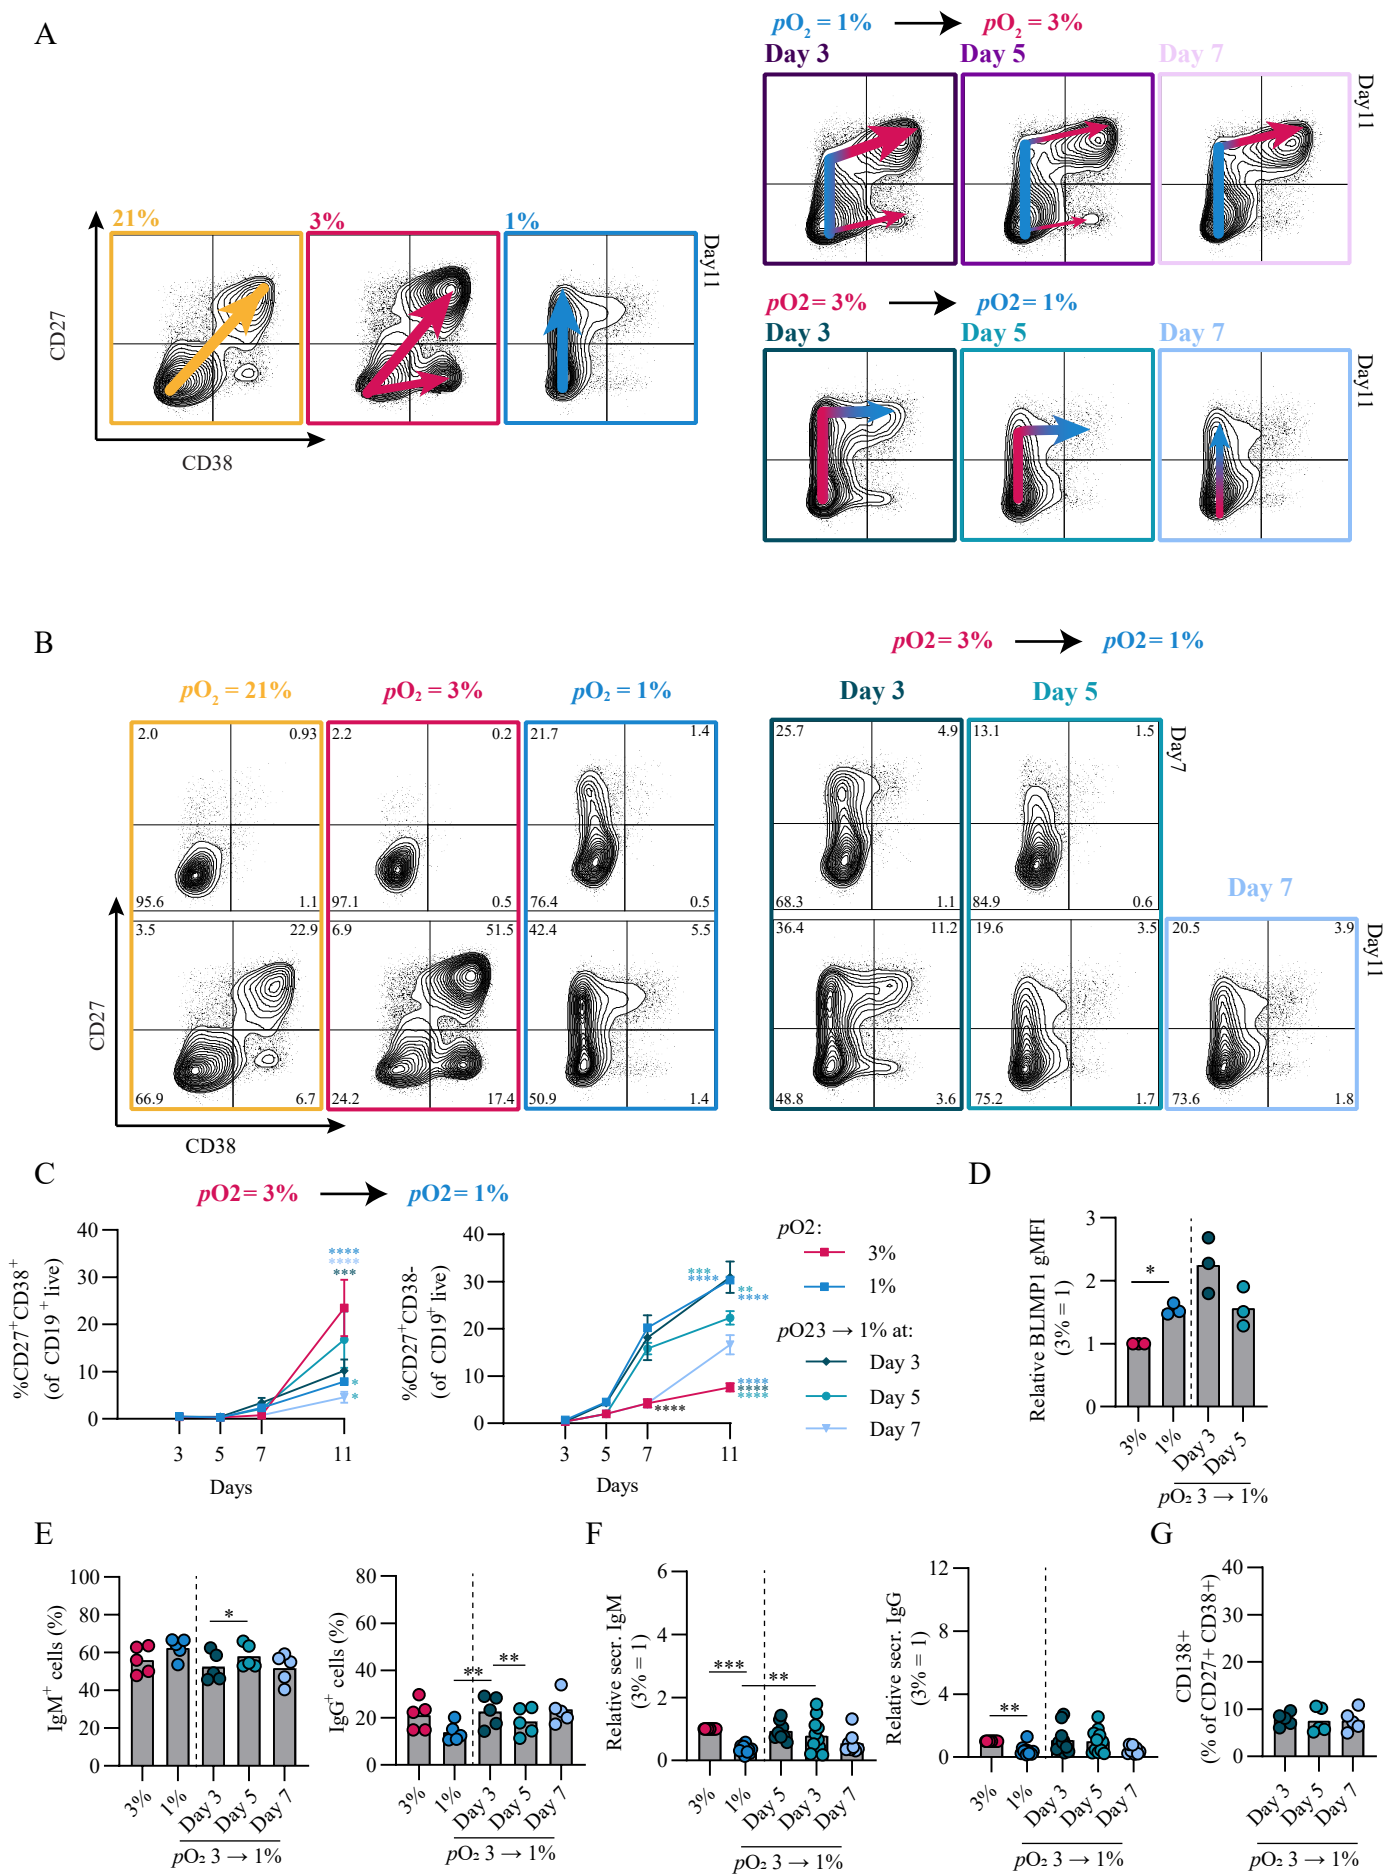

**Figure S6.** Time-dependent  $pO_2$  transitions alter B cell differentiation dynamics and promote CSR to IgG. (A) Schematic representation of CD27/CD38 differentiation trajectories of human naive B cells *in vitro* (B) Representative biaxial CD27/CD38 FACS plots of 21, 3 and 1%  $pO_2$  cultures and 3 - 1%  $pO_2$  transition cultures at day 3, 5 and 7 shown for day 7 and 11 of culture. (C) Quantification of CD27<sup>+</sup>CD38<sup>+</sup> and CD27<sup>+</sup>CD38<sup>-</sup> B cell formation ( $n = 11$ ) (D) gMFI of BLIMP1 at day 7 ( $n = 3$ ) (E) Frequency of IgM<sup>+</sup> and IgG<sup>+</sup> cells determined by intracellular flow cytometry ( $n = 5$ ) (F) and cumulative IgM and IgG secretion in culture supernatants at day 11 in 3 and 1%  $pO_2$  cultures and 3 - 1%  $pO_2$  transition cultures ( $n = 11$ ). (G) CD138 expression within the CD27<sup>+</sup>CD38<sup>+</sup> ASC population ( $n = 5$ ). Bars represent means of biological replicates each composed of two technical replicates of (C, F) 3, (E, G) 2, or (D) 1 independent experiment. Statistical differences were determined using mixed-effects analysis using Tukey's test for multiple comparisons. \*  $p < 0.05$ , \*\*  $p < 0.01$ , \*\*\*  $p < 0.001$ , \*\*\*\*  $p < 0.0001$ .
